# Supplementary material
Source: PubMed Central journal article supplement (PMC8814678)
Supplement: 10.1182-2021014085_bloodbld2021014085-suppl1.pdf [file 10.1182-2021014085_bloodbld2021014085-suppl1.pdf]

**Supplementary Table 1. Means and medians of serologic response, post third vaccination, in CLL patients**

| Variable                        | Categories                     | Serologic response (AU/mL) |        |                     |         |
|---------------------------------|--------------------------------|----------------------------|--------|---------------------|---------|
|                                 |                                | Mean                       | Median | Interquartile range | p-value |
| All patients                    |                                | 1066.7                     | 2.0    | 0.0-40.8            |         |
| Age in time of vaccination (y)  | ≤65                            | 2169.9                     | 12.0   | 0.0-422             | 0.034   |
|                                 | >65                            | 804.8                      | 1.0    | 0.0-33.0            |         |
| Sex                             | Females                        | 873.2                      | 3.0    | 0.0-58.0            | 0.765   |
|                                 | Males                          | 1148.3                     | 1.0    | 0.0-40.2            |         |
| Treatment status (detailed)     | Treatment-naïve                | 821.0                      | 8.0    | 0.3-509.8           | <0.001  |
|                                 | On-therapy                     | 225.0                      | 0.0    | 0.0-10.3            |         |
|                                 | Off-therapy                    | 4004.4                     | 6.0    | 0.0-764.5           |         |
| Treatment status (dichotomized) | Lack of active therapy         | 2235.8                     | 6.0    | 0.0-561.5           | <0.001  |
|                                 | On-therapy                     | 225.0                      | 0.0    | 0.0-10.3            |         |
| Binet stage                     | A                              | 1383.2                     | 40     | 3.0-600.8           | 0.058   |
|                                 | B or C                         | 244.9                      | 3.0    | 0.0-110.0           |         |
| IGHV                            | Mutated                        | 2540.0                     | 0.0    | 0.0-34.5            | 0.878   |
|                                 | Unmutated                      | 488.8                      | 1.0    | 0.0-18.0            |         |
| FISH test                       | Normal                         | 252.0                      | 4.0    | 0.0-49.0            | 0.571   |
|                                 | del(13q )                      | 1300.5                     | 0.02   | 0.0-32.8            |         |
|                                 | Trisomy 12                     | 2856.1                     | 0.0    | 0.0-18.0            |         |
|                                 | del(11q)                       | 814.9                      | 2.0    | 0.0-17.8            |         |
|                                 | del(17p)                       | 575.0                      | 0.5    | 0.0-38.0            |         |
| Treatment protocol              | BTKi                           | 183.5                      | 0.0    | 0.0-21.0            | 0.226   |
|                                 | Venetoclax± anti-CD20 antibody | 299.3                      | 0.0    | 0.0-3.0             |         |
|                                 | Others                         | 0.0                        | 0.0    | 0.0-0.0             |         |
| Anti-CD20 (last treatment)      | Within less 12 months          | 33.0                       | 0.0    | 0.0-3.0             | 0.257   |
|                                 | At least 12 months             | 2028.9                     | 0.0    | 0.0-21.3            |         |
| Serum IgG level (mg/dL)         | <550                           | 2369.8                     | 0.0    | 0.0-2.0             | 0.006   |
|                                 | ≥550                           | 465.8                      | 3.0    | 0.0-60.3            |         |
| Serum IgM level (mg/dL)         | <40                            | 1306.9                     | 1.0    | 0.0-41.0            | 0.054   |
|                                 | ≥40                            | 69.6                       | 0.0    | 0.0-9.8             |         |
| Serum IgA level (mg/dL)         | <80                            | 1101.2                     | 0.0    | 0.0-6.0             | <0.001  |
|                                 | ≥80                            | 1021.3                     | 6.0    | 0.0-283.5           |         |

Abbreviations: FISH - Fluorescence in situ hybridization; IGHV -immunoglobulin heavy chain; P – probability value; y – years

**Supplementary Table 2. Baseline characteristics and outcome of CLL patients with COVID-19 after the third vaccine dose**

| At the time of third vaccination |        |                  |                           |                                                            |                                               | COVID-19 severity and outcome |                 |           |
|----------------------------------|--------|------------------|---------------------------|------------------------------------------------------------|-----------------------------------------------|-------------------------------|-----------------|-----------|
| Age, years                       | Sex    | Treatment status | Active treatment protocol | Treated with anti-CD20 (time since last treatment, months) | Antibody titer post third vaccination (AU/mL) | Hospitalization               | Severe COVID-19 | Outcome   |
| 77.7                             | Female | On therapy       | Ibrutinib                 | -                                                          | 0.0                                           | -                             | -               | Recovered |
| 73.8                             | Female | Off-therapy      | -                         | + (17.5)                                                   | 0.0                                           | +                             | +               | Recovered |
| 66.0                             | Male   | Treatment- naïve | NR                        | -                                                          | 138                                           | -                             | -               | Recovered |
| 73.7                             | Male   | On-therapy       | Ibrutinib                 | + (58.0)                                                   | 0.0                                           | +                             | +               | Death     |

(+) Yes, (-) No, m – months, NR – not relevant.

## **Adverse events**

**Supplementary table 3. Adverse events after the third vaccine dose**

| Adverse event | Type                      | N  | %    |
|---------------|---------------------------|----|------|
| Local         | Local pain                | 93 | 55.4 |
|               | Local redness/edema       | 20 | 11.9 |
| Systemic      | Fatigue                   | 26 | 15.5 |
|               | Weakness                  | 21 | 12.5 |
|               | Myalgia                   | 16 | 9.5  |
|               | Fever                     | 13 | 7.7  |
|               | Headaches                 | 12 | 7.1  |
|               | Enlarged axil lymph nodes | 6  | 3.6  |
|               | Chills                    | 5  | 3.0  |
|               | Others                    | 3  | 1.8  |
|               | Arthralgia                | 2  | 1.2  |
|               | Nausea                    | 2  | 1.2  |
|               | Allergy                   | 1  | 0.6  |

% – type of an adverse event out of 168 patients.
